# Supplementary material for: The dynamics of behavior in modified dictator games
Source: PLOS journal article supplement (doi:10.1371/journal.pone.0176199), 2017-04-27
Supplement: S6 (10.1371/journal.pone.0176199.s006) [file journal.pone.0176199.s006]

## S6. Regression results.

**Table A. Ordered probit model on the amount taken from player B.**

|                       | Ordered Probit       |
|-----------------------|----------------------|
| Wave 2                | 0.837***<br>(0.176)  |
| Wave 3                | 2.006***<br>(0.247)  |
| T2                    | 0.0718<br>(0.0939)   |
| T3                    | -0.252**<br>(0.100)  |
| T4                    | -0.552***<br>(0.149) |
| Observations          | 420                  |
| Cluster per subjects  | yes                  |
| Prob > Chi2           | 0.0000               |
| Pseudo R <sup>2</sup> | 0.1310               |

Notes: Ordered Probit regression. Standard errors in parentheses, clustered at subjects level.

\*\*\*Significant at the 1 percent level.

\*\*Significant at the 5 percent level.

\* Significant at the 10 percent level

**Table B. Ordered logit model on the amount taken from player B.**

|                       | Ordered Logit        |
|-----------------------|----------------------|
| Wave 2                | 1.439***<br>(0.296)  |
| Wave 3                | 3.461***<br>(0.502)  |
| T2                    | 0.0832<br>(0.157)    |
| T3                    | -0.501***<br>(0.184) |
| T4                    | -0.986***<br>(0.276) |
| Observations          | 420                  |
| Cluster per subjects  | yes                  |
| Prob > Chi2           | 0.0000               |
| Pseudo R <sup>2</sup> | 0.1289               |

Notes: Ordered logit regression. Standard errors in parentheses, clustered at subjects level.

\*\*\*Significant at the 1 percent level.

\*\*Significant at the 5 percent level.

\* Significant at the 10 percent level

**Table C. Hurdle model on the amount given to player B.**

|                      | Logit Participate    | Truncated linear regression Tau |
|----------------------|----------------------|---------------------------------|
| Wave 2               | -0.813*<br>(0.454)   | -6.257<br>(164.1)               |
| Wave 3               | -0.177<br>(0.252)    | 165.7<br>(172.6)                |
| T2                   | 0.359*<br>(0.195)    | 126.4<br>(324.1)                |
| T3                   | -0.270<br>(0.342)    | 650.5**<br>(290.5)              |
| T4                   | -0.270<br>(0.294)    | -1202.2<br>(943.1)              |
| Constant             | -1.414***<br>(0.232) | -283.9<br>(423.8)               |
| Observations         | 420                  | 21(!)                           |
| Cluster per subjects | yes                  | yes                             |

Notes: Hurdle model on amount given to Player B. Standard errors in parentheses, clustered at subjects level. Wald test has  $\chi^2(5)=32.17$  (p-value<0.001)

\*\*\*Significant at the 1 percent level.

\*\*Significant at the 5 percent level.

\* Significant at the 10 percent level

**Table D. Ordered probit model on the amount given to player B.**

|                       | Ordered Probit     |
|-----------------------|--------------------|
| Wave 2                | -0.792*<br>(0.438) |
| Wave 3                | -0.142<br>(0.245)  |
| G2                    | 0.326<br>(0.216)   |
| G3                    | -0.180<br>(0.341)  |
| G4                    | -0.352<br>(0.278)  |
| Observations          | 420                |
| Cluster per subjects  | yes                |
| Prob > Chi2           | 0.0000             |
| Pseudo R <sup>2</sup> | 0.0527             |

Notes: Ordered probit regression on amount given to player B. Standard errors in parentheses, clustered at subjects level.

\*\*\*Significant at the 1 percent level.

\*\*Significant at the 5 percent level.

\* Significant at the 10 percent level

**Table E. Ordered logit model on the amount given to player B.**

|                       | Ordered Logit     |
|-----------------------|-------------------|
| Wave 2                | -1.784<br>(1.111) |
| Wave 3                | -0.329<br>(0.517) |
| G2                    | 0.734*<br>(0.431) |
| G3                    | -0.516<br>(0.800) |
| G4                    | -0.584<br>(0.658) |
| Observations          | 420               |
| Cluster per subjects  | yes               |
| Prob > Chi2           | 0.0000            |
| Pseudo R <sup>2</sup> | 0.0524            |

Notes: Ordered logit regression on amount given to player B. Standard errors in parentheses, clustered at subjects level.

\*\*\*Significant at the 1 percent level.

\*\*Significant at the 5 percent level.

\* Significant at the 10 percent level

**Table F. Logit model on decisions made in the PD games.**

|                       | Logit regression    |
|-----------------------|---------------------|
| Wave 2                | 0.663***<br>(0.200) |
| Wave 3                | 0.655***<br>(0.214) |
| PD II                 | 0.0772<br>(0.0969)  |
| B chooses D           | 0.177<br>(0.168)    |
| Constant              | 0.319<br>(0.213)    |
| Observations          | 240                 |
| Cluster per subjects  | yes                 |
| Prob > Chi2           | 0.0065              |
| Pseudo R <sup>2</sup> | 0.0535              |

Notes: Logit regression on choosing option *c* or *d* with *c*=0 and *d*=1. Standard errors in parentheses, clustered at subjects level.

\*\*\*Significant at the 1 percent level.

\*\*Significant at the 5 percent level.

\* Significant at the 10 percent level

**Table G. Probit model on decisions made in the PD games.**

|                       | Probit regression   |
|-----------------------|---------------------|
| Wave 2                | 1.142***<br>(0.354) |
| Wave 3                | 1.142***<br>(0.379) |
| PD II                 | 0.126<br>(0.162)    |
| B chooses D           | 0.315<br>(0.299)    |
| Constant              | 0.499<br>(0.350)    |
| Observations          | 240                 |
| Cluster per subjects  | yes                 |
| Prob > Chi2           | 0.0071              |
| Pseudo R <sup>2</sup> | 0.0535              |

Notes: Probit regression on choosing option *c* or *d* with *c*=0 and *d*=1. Standard errors in parentheses, clustered at subjects level.

\*\*\*Significant at the 1 percent level.

\*\*Significant at the 5 percent level.

\* Significant at the 10 percent level
